# Supplementary material for: A reliability assessment of a direct-observation park evaluation tool: the Parks, activity and recreation among kids (PARK) tool
Source: BMC Public Health. 2015 Sep 17;15:906. doi: 10.1186/s12889-015-2209-0 (PMC4573305; doi:10.1186/s12889-015-2209-0)
Supplement: Additional file 2: — Kappa and percent agreement results for all items on the PARK Tool. This contains the kappa and percent agreement estimates for all the items on the PARK Tool. (XLSX 13 kb) [file 12889_2015_2209_MOESM2_ESM.xlsx]

## Sheet: Sheet1
Additional file 2. Kappa and percent agreement results for all items on the PARK tool
ACTIVITIES
ITEM	Kappa	95% CI	% Agree
Park Type	0.720a	.656; .784	88.25
Tennis Courts Present	0.98	.960; 1.00	99.48
Tennis Accessible	0.688	.457; .920	92.94
Tennis Condition	0.184	-.185; .552	91.77
Tennis Restriction	0.481	.294; .667	74.12
Basketball Courts Present	0.902	.856; .948	97.04
Basketball Accessible	n/ab	n/ab	97.94
Basketball Condition	0.245	.031; .458	72.17
Basketball Restriction	0.49	-.119; 1.00	97.94
Badminton/Volleyball Courts Present	0.886	.802; .969	98.78
Badminton/Volleyball Accessible	n/ab	n/ab	96.55
Badminton/Volleyball Condition	0.583	.222; .944	86.2
Badminton/Volleyball Restriction	n/ab	n/ab	88.89
Soccer/Football/Rugby Field Present	0.984	.968; 1.00	99.31
Soccer/Football/Rugby Accessible	0.886	.665; 1.00	99.43
Soccer/Football/Rugby Condition	0.407	.205; .609	87.5
Soccer/Football/Rugby Restriction	0.476	.167; .785	95.4
Baseball/Softball Field Present	0.955	.927; .983	98.26
Baseball/Softball Accessible	0.758	.495; 1.00	97.91
Baseball/Softball Condition	0.557	.352; .762	90.21
Baseball/Softball Restriction	0.436	.089; .782	95.07
Hockey/Ringette Rink Present	0.98	.942; 1.00	99.83
Hockey/Ringette Accessible	1	1	100
Hockey/Ringette Condition	0.595	.183; 1.00	88
Hockey/Ringette Restriction	0.649	.016; 1.00	96.16
Track (Track & Field) Present	0.638	.473; .802	97.21
Track Accessible	n/ab	n/ab	93.33
Track Condition	0.4	-.090; .890	73.33
Trail Present	0.6016	.535; .668	80.8
Trail Accessible	n/ab	n/ab	99.65
Trail Condition	0.264	.034; .493	93.31
Bike Path Present	0.743	.646; .839	95.65
Bike Path Accessible	n/ab	n/ab	100
Bike Path Condition	n/ab	n/ab	95.12
Skate Park Present	0.976	.944; 1.00	99.65
Skate Park Accessible	n/ab	n/ab	100
Skate Park Condition	0.657	.031; 1.00	97.78
Skate Park Restriction	0.1	-.260; .460	82.22
6+ Play Area Present	0.935	.900; .970	97.74
6+ Play Area Accessible	n/ab	n/ab	99.31
6+ Play Area Condition	0.295	.116; .473	92.68
Multi-Use Area Present	0.596	.529; .664	81.01
Multi-Use Area Accessible	1	1	100
Multi-Use Area Condition	0.235	.061; .410	88.81
School Yard Present	0.958	.929; .987	98.6
School Yard Accessible	0.654	.288; 1.00	97.43
School Yard Condition	0.17	-.072; .411	84.49
Equipment Rental Available	0.664	.306; 1.00	99.47
Pool Present	1	1	100
Length of Pool	n/ab	n/ab	70.21
Pool Condition	.511a	.130; .893	80.44
Pool Cleanliness	.598a	.324; .871	76.09
Water Sprinklers Present	.882a	.816; .948	97.91
Water Sprinklers Condition	.893a	.723; 1.00	96
Water Sprinklers Cleanliness	.557a	.291; .823	76
ENVIRONMENTAL QUALTY
ITEM	Kappa	95% CI	% Agree
Large Body of Water Present	0.916	.852; .983	98.95
Sportive Aquatic Activities Present	0.683	.431; .935	86.11
Pond or Fountain Present	0.704	.544; .863	98.44
Aquatic Activities Present	1	1	100
Decorative or Cultural Features	0.549	.466; .632	84.5
Garden Present	0.605	.539; .671	80.84
Shady Areas Present	0.523a	.464; .583	67.49
No Dogs Allowed Sign Present	0.767	.714; .819	88.33
Graffiti Present	0.514a	.451; .576	69.34
Vandalism Present	0.224a	.141; .308	76.27
Litter Present	0.417a	.343; .491	67.3
SERVICES
ITEM	Kappa	95% CI	% Agree
Garbage Bins Present	0.811a	.702; .920	97.91
Drinking Fountains Present	0.918a	.889; .948	94.77
Picnic Tables Present	0.855a	.813; .898	92.68
Sitting Benches Present	0.679	.570; .789	94.93
Bleachers Present	0.916	.883; .949	95.65
Public Toilets Present	0.822a	.772; .872	92.15
Condition of Toilets	0.846a	.771; .920	91.09
Chalet/Change Room Present	0.673	.588; .758	91.46
Condition of Chalet/ Change Room	n/ab	n/ab	80.95
Parking Present	0.728a	.675; .781	86.19
Bike Locks Present	0.839	.795; .884	91.97
Public Transportation Present	0.759	.704; .813	88.48
SAFETY
ITEM	Kappa	95% CI	% Agree
Sufficient Lighting for Park	0.591	.517; .664	83.28
At Least 1 Street Visible from Centre	0.644	.565; .722	88.49
At Least 1 House Visible from Centre	0.554	.466; .643	86.74
Adjacent Streets Local	0.609a	.542; .675	82.24
Traffic Calming Measures Present	0.448a	.382; .513	63.24
Pedestrian Safety Present	0.648a	.596; .700	73.87
GENERAL IMPRESSION
ITEM	Kappa	95% CI	% Agree
Overall Appealing for Youth	0.480a	.424; .536	60.1
Overall Safe	0.349a	.281; .417	59.97
Overall Attractive/ Pretty	0.362a	.297; .427	58.19
Attractive for Walking	0.528a	.470; .586	66.55
Attractive for Bicycling	0.589a	.516; .663	81.53
Attractive for Active Play	0.537a	.484; .588	61.85
a indicates kappa is weighted
b indicates kappa could not be calculated due to a lack of response variation between observers
