# Supplementary material for: A reliability assessment of a direct-observation park evaluation tool: the Parks, activity and recreation among kids (PARK) tool
Source: BMC Public Health. 2015 Sep 17;15:906. doi: 10.1186/s12889-015-2209-0 (PMC4573305; doi:10.1186/s12889-015-2209-0)
Supplement: Additional file 3: — Test-retest results for intra-observer reliability. This contains the intra-observer reliability estimates for 41 items on the PARK Tool. (XLSX 11 kb) [file 12889_2015_2209_MOESM3_ESM.xlsx]

## Sheet: Sheet1
Additional file 3. Test-retest results for intra-observer reliability
Item	Kappa	95% CI	% Agree
Tennis Courts Present	0.939	.821; 1.00	97.5
Basketball Courts Present	0.827	.641; 1.00	92.5
Badminton/Volleyball Courts Present	0.844	.545; 1.00	97.5
Soccer/Football/Rugby Field Present	0.944	.836; 1.00	97.5
Baseball/Softball Field Present	0.898	.760; 1.00	95
Hockey/Ringette Rink Present	-0.026	-.061; .010	95
Trail Present	0.733	.488; .979	90
Bike Path Present	0.448	.001; .896	90
Skate Park Present	0.844	.545; 1.00	97.5
6+ Play Area Present	0.804	.541; 1.00	95
Multi-Use Area Present	0.595	.330; .861	82.5
School Yard Present	0.942	.830; 1.00	97.5
Pool Present	0.787	.385; 1.00	97.5
Water Sprinklers Present	…	…	92.5
Large Body of Water Present	0.844	.545; 1.00	97.5
Decorative or Cultural Features	0.571	.268; .875	85
Garden Present	0.495	.224; .767	78
No Dogs Allowed Sign Present	0.696	.477; .916	85
Bleachers Present	…	…	87.5
Chalet/ Change Room Present	0.731	.514; .948	87.5
Bike Locks Present	0.632	.385; .878	82.5
Public Transportation Present	0.688	.460; .917	85
Sufficient Lighting for Park	0.479	.097; .861	87.5
At Least 1 Street Visible from Center	0.521	.215; .826	82.5
At Least 1 House Visible from Center	0.319	-.035; .673	80
Park Type	0.793 a	.548; 1.00	92.5
Shady Areas Present	0.406 a	.110; .702	70
Pond or Fountain Present	1.00 a	1	100
Public Toilets	0.725 a	.516; .934	85
Parking Present	0.643 a	.382; .904	87.5
Graffiti Present	0.470 a	.224; .716	67.5
Vandalism Present	0.503 a	.167; .839	82.5
Litter Present	0.377 a	.150; .604	52.5
Drinking Fountain Present	0.629 a	.422; .835	72.5
Picnic Tables Present	0.546 a	.270; .821	80
Adjacent Streets Local	0.743 a	.566; .920	82.5
Traffic Calming Measures Present	0.379 a	.132; .626	55
Pedestrian Safety Present	0.461 a	.231; .691	65
Overall Appealing for Youth	0.492 a	.279; .705	60
Overall Safe	0.479 a	.266; .693	70
Overall Attractive/Pretty	0.658 a	.455; .861	77.5
Attractive for Walking	0.593 a	.398; .787	67.5
Attractive for Bicycling	0.844 a	.673; 1.00	92.5
Attractive for Active Play	0.646 a	.446; .846	75
a Indicates kappa is weighted.
CI = Confidence interval.
